# Supplementary material for: The Road to Infection: Host-Microbe Interactions Defining the Pathogenicity of Streptococcus bovis/Streptococcus equinus Complex Members
Source: Front Microbiol. 2018 Apr 10;9:603. doi: 10.3389/fmicb.2018.00603 (PMC5902542; doi:10.3389/fmicb.2018.00603)
Supplement: Supplementary file 1 [file DataSheet1.XLSX]

## Sheet: final summary-pub
autonumber	Species	concat sort	Strains in category	strain	Genbank	host simplified	host	Source simplified	isolation-source	geographic-locatoin	Isolation-year	pil1gene2 sortase-C	pil1gene1 peptidoglycan linked protein fimbrial structural unit LPXTG Pil1B	pil1gene3 collagen-binding protein FPXTG Pil1A	pil2gene1 sortase-C	pil2gene2 peptidoglycin linked protein fimbrial structural subunit LPXTG Pil2B	pil2gene3 putative adhesin FPXTG	pil3gene1 sortase-C	pil3gene2 cell wall anchored protein LPXTG Pil3B	pil3gene3 peptidoglycan linked protein LPXTG Pil3A	sbs6	sbs10	sbs13	sbs16	hlpA	atlA	PAc	Count	pil1gene2 sortase-C	pil1gene1 peptidoglycan linked protein fimbrial structural unit LPXTG	pil1gene3 collagen-binding protein FPXTG	pil2gene1 sortase-C	pil2gene2 peptidoglycin linked protein fimbrial structural subunit LPXTG	pil2gene3 putative adhesin FPXTG	pil3gene1 sortase-C	pil3gene2 cell wall anchored protein LPXTG	pil3gene3 peptidoglycan linked protein LPXTG	sbs6	sbs10	sbs13	sbs16	hlpA	atlA	PAc	Comments pil1	Comments pil2	Comments pil3	Other pil
11	SE	SE_animal_feces	3	ATCC33317	NZ_AUZG01000000	animal	cow	feces	cow dung	USA	unknown	+	+	other	+	+	other	+	+	+	+	+	-	-	+	other	-	1	+ (1); - (2); truncated (0); other (0)	+ (1); - (2); truncated (0); other (0)	+ (0); - (2); truncated (0); other (1)	+ (3); - (0); truncated (0); other (0)	+ (3); - (0); truncated (0); other (0)	+ (0); - (1); truncated (1); other (1)	+ (3); - (0); truncated (0); other (0)	+ (3); - (0); truncated (0); other (0)	+ (3); - (0); truncated (0); other (0)	+ (2); - (1); truncated (0); other (0)	+ (3); - (0); truncated (0); other (0)	+ (0); - (3); truncated (0); other (0)	+ (0); - (3); truncated (0); other (0)	+ (3); - (0); truncated (0); other (0)	+ (0); - (0); truncated (0); other (3)	+ (0); - (3); truncated (0); other (0)	no	no	no	no
47	SE	SE_animal_feces		ATCC9812	NZ_GL698429-NZ_GL698448	animal	horse	feces	feces	UK	unknown	-	-	-	+	+	truncated	+	+	+	-	+	-	-	+	other	-	1																	no	no	no	unknown partial pil locus without sortase C
9	SE	SE_animal_feces		SN033	NZ_ATWZ01000000	animal	animal	feces	feces	New Zealand	unknown	-	-	-	+	+	-	+	+	+	+	+	-	-	+	other	-	1																	second pil1 gene1 independent next to ssrS	no	no	no
48	SE	SE_animal_rumen	9	2B	NZ_JNKQ01000000	animal	sheep	rumen	sheep rumen	Scotland		+	+	other	-	-	-	-	-	-	-	+	-	-	-	-	-	1	+ (3); - (6); truncated (0); other (0)	+ (3); - (6); truncated (0); other (0)	+ (0); - (6); truncated (0); other (3)	+ (7); - (2); truncated (0); other (0)	+ (7); - (2); truncated (0); other (0)	+ (0); - (6); truncated (0); other (3)	+ (7); - (2); truncated (0); other (0)	+ (7); - (2); truncated (0); other (0)	+ (7); - (2); truncated (0); other (0)	+ (6); - (3); truncated (0); other (0)	+ (5); - (4); truncated (0); other (0)	+ (0); - (9); truncated (0); other (0)	+ (0); - (9); truncated (0); other (0)	+ (6); - (3); truncated (0); other (0)	+ (0); - (4); truncated (0); other (5)	+ (0); - (9); truncated (0); other (0)	second pil1 gene1 independent next to ssrS	no	no	no
49	SE	SE_animal_rumen		AG46	NZ_JNLO01000000	animal	sheep	rumen	sheep rumen	unknown	unknown	+	+	other	+	+	other	+	+	+	-	-	-	-	-	-	-	1																	second pil1 gene1 independent next to ssrS	no	no	no
10	SE	SE_animal_rumen		B315	NZ_AUJD01000000	animal	cow	rumen	cow rumen	New Zealand	unknown	-	-	-	-	-	-	-	-	-	+	+	-	-	+	-	-	1																	second pil1 gene1 independent next to ssrS	no	no	no
50	SE	SE_animal_rumen		HC5	NZ_JPGC01000000	animal	cow	rumen	cow rumen	USA	2000	+	+	other	+	+	other	+	+	+	+	+	-	-	+	other	-	1																	second pil1 gene1 independent next to ssrS	no	no	no
12	SE	SE_animal_rumen		JB1	NZ_AUZH01000000	animal	cow	rumen	cow rumen	USA	1977	-	-	-	+	+	-	+	+	+	+	+	-	-	+	other	-	1																	no	no	no	no
36	SE	SE_animal_rumen		MPR1	NZ_FOFQ01000000	animal	camel	rumen	camel rumen	unknown	2004	-	-	-	+	+	-	+	+	+	+	-	-	-	+	other	-	1																	second pil1 gene1 independent next to ssrS	no	no	no
20	SE	SE_animal_rumen		MPR2	NZ_FNEP01000000	animal	camel	rumen	camel rumen	unknown	2004	-	-	-	+	+	-	+	+	+	+	-	-	-	+	other	-	1																	second pil1 gene1 independent next to ssrS	no	no	no
40	SE	SE_animal_rumen		MPR4	NZ_FOOP00000000	animal	camel	rumen	camel rumen	unknown	2004	-	-	-	+	+	-	+	+	+	-	-	-	-	-	-	-	1																	second pil1 gene1 independent next to ssrS	no	no	no
19	SE	SE_animal_rumen		GA-1	NZ_FMTH01000000	animal	unknown	rumen	rumen	unknown	unknown	-	-	-	+	+	other	+	+	+	+	+	-	-	+	other	-	1																	second pil1 gene1 independent next to ssrS	no	no	no
27	SE	SE_animal_unknown	8	Sb05	NZ_FNKE01000000	animal	Bos indicus cross	unknown	unknown	Australia	unknown	+	+	other	+	+	-	+	+	+	-	-	-	-	+	other	-	1	+ (8); - (0); truncated (0); other (0)	+ (8); - (0); truncated (0); other (0)	+ (0); - (0); truncated (0); other (8)	+ (7); - (1); truncated (0); other (0)	+ (7); - (1); truncated (0); other (0)	+ (0); - (6); truncated (0); other (2)	+ (8); - (0); truncated (0); other (0)	+ (8); - (0); truncated (0); other (0)	+ (8); - (0); truncated (0); other (0)	+ (5); - (3); truncated (0); other (0)	+ (5); - (3); truncated (0); other (0)	+ (2); - (6); truncated (0); other (0)	+ (0); - (8); truncated (0); other (0)	+ (8); - (0); truncated (0); other (0)	+ (2); - (1); truncated (0); other (5)	+ (2); - (6); truncated (0); other (0)	second pil1 gene1 independent next to ssrS	no	no	no
22	SE	SE_animal_unknown		Sb09	NZ_FNGX01000000	animal	Capra hircus	unknown	unknown	Australia	unknown	+	+	other	+	+	-	+	+	+	+	+	+	-	+	other	-	1																	second complete pil1 locus with cnaB type domain containing protein third pil1 gene1 independent next to ssrS	no	no	no
25	SE	SE_animal_unknown		Sb10	NZ_FNJY01000000	animal	Bos taurus	unknown	unknown	Australia	unknown	+	+	other	+	+	other	+	+	+	+	-	-	-	+	other	-	1																	second pil1 gene1 independent next to ssrS	no	no	no
28	SE	SE_animal_unknown		Sb17	NZ_FNMW01000000	animal	Bos indicus cross	unknown	unknown	Australia	unknown	+	+	other	+	+	-	+	+	+	+	+	-	-	+	other	-	1																	second pil1 gene1 independent next to ssrS	no	no	no
35	SE	SE_animal_unknown		Sb18	NZ_FOEX01000000	animal	Bos indicus cross	unknown	unknown	Australia	unknown	+	+	other	+	+	other	+	+	+	+	+	-	-	+	other	+	1																	second pil1 gene1 independent next to ssrS	no	no	no
42	SE	SE_animal_unknown		Sb20	NZ_FOZA01000000	animal	Bos indicus cross	unknown	unknown	Australia	unknown	+	+	other	-	-	-	+	+	+	-	-	-	-	+	+	+	1																	second pil1 locus present but truncated third pil1 gene1 independent next to ssrS	no	no	no
30	SE	SE_animal_unknown		Ye01	NZ_FNYU01000000	animal	Capra hircus	unknown	unknown	Australia	unknown	+	+	other	+	+	-	+	+	+	+	+	+	-	+	-	-	1																	second pil1 gene1 independent next to ssrS	no	no	no
23	SE	SE_animal_unknown		Sb04	NZ_FNJK01000000	animal	Bos indicus cross	unknown	unknown	Australia	unknown	+	+	other	+	+	-	+	+	+	-	+	-	-	+	+	-	1																	second pil1 gene1 independent next to ssrS	no	no	no
59	SE	SE_human_feces	2	ICDDRB-NRC-S6	NZ_LPVR01000000	human	human	feces	stool of health child	Bangladesh, Dhaka	2011	-	-	-	-	-	-	-	-	-	-	-	-	-	+	other	-	1	+ (0); - (2); truncated (0); other (0)	+ (0); - (2); truncated (0); other (0)	+ (0); - (2); truncated (0); other (0)	+ (1); - (1); truncated (0); other (0)	+ (1); - (1); truncated (0); other (0)	+ (0); - (1); truncated (1); other (0)	+ (1); - (1); truncated (0); other (0)	+ (0); - (1); truncated (1); other (0)	+ (1); - (1); truncated (0); other (0)	+ (1); - (1); truncated (0); other (0)	+ (1); - (1); truncated (0); other (0)	+ (0); - (2); truncated (0); other (0)	+ (0); - (2); truncated (0); other (0)	+ (2); - (0); truncated (0); other (0)	+ (1); - (0); truncated (0); other (1)	+ (0); - (2); truncated (0); other (0)	no	no	no	no
1	SE	SE_human_feces		HSISB1	CM002131	human	human	feces	ileostomy effluent	the Netherlands	unknown	-	-	-	+	+	truncated	+	truncated	+	+	+	-	-	+	+	-	1																	no	no	no	no
45	SE	SE_human_other	1	ATCC 700338	NZ_GL397128-NZ_GL397137	human	human	other	vagina	unknown	unknown	-	-	-	-	-	-	-	-	-	+	+	+	+	+	+	-	1	+ (0); - (1); truncated (0); other (0)	+ (0); - (1); truncated (0); other (0)	+ (0); - (1); truncated (0); other (0)	+ (0); - (1); truncated (0); other (0)	+ (0); - (1); truncated (0); other (0)	+ (0); - (1); truncated (0); other (0)	+ (0); - (1); truncated (0); other (0)	+ (0); - (1); truncated (0); other (0)	+ (0); - (1); truncated (0); other (0)	+ (1); - (0); truncated (0); other (0)	+ (1); - (0); truncated (0); other (0)	+ (1); - (0); truncated (0); other (0)	+ (1); - (0); truncated (0); other (0)	+ (1); - (0); truncated (0); other (0)	+ (1); - (0); truncated (0); other (0)	+ (0); - (1); truncated (0); other (0)	no	no	no	no
44	SE	SE_unknown_unknown	8	AR3	NZ_FZRA00000000	unknown	unknown	unknown	unknown	unknown	unknown	-	-	-	+	+	other	+	+	+	-	-	-	-	-	-	-	1	+ (4); - (4); truncated (0); other (0)	+ (4); - (4); truncated (0); other (0)	+ (0); - (6); truncated (0); other (2)	+ (6); - (2); truncated (0); other (0)	+ (6); - (2); truncated (0); other (0)	+ (0); - (5); truncated (0); other (3)	+ (8); - (0); truncated (0); other (0)	+ (8); - (0); truncated (0); other (0)	+ (8); - (0); truncated (0); other (0)	+ (7); - (1); truncated (0); other (0)	+ (6); - (2); truncated (0); other (0)	+ (0); - (8); truncated (0); other (0)	+ (0); - (8); truncated (0); other (0)	+ (7); - (1); truncated (0); other (0)	+ (3); - (1); truncated (0); other (4)	+ (0); - (8); truncated (0); other (0)	second pil1 gene1 independent next to ssrS	no	no	no
26	SE	SE_unknown_unknown		C277	NZ_FNKC01000000	unknown	unknown	unknown	unknown	unknown	unknown	+	+	-	-	-	-	+	+	+	+	+	-	-	+	other	-	1																	second pil1 gene1 independent next to ssrS	pil1 or pil2, very close match 49-50% RS06330-RS06325 present but third gene missing	no	no
34	SE	SE_unknown_unknown		ES1	NZ_FODM01000000	unknown	unknown	unknown	unknown	unknown	unknown	+	+	-	-	-	-	+	+	+	+	+	-	-	+	other	-	1																	second pil1 gene1 independent next to ssrS	pil1 or pil2, very close match 49-50% RS06645-RS06640 present but third gene missing	no	no
31	SE	SE_unknown_unknown		H24	NZ_FNZS01000000	unknown	unknown	unknown	unknown	unknown	unknown	-	-	-	+	+	-	+	+	+	+	+	-	-	+	+	-	1																	second pil1 gene1 independent next to ssrS	no	no	no
24	SE	SE_unknown_unknown		pGA-7	NZ_FNJX01000000	unknown	unknown	unknown	unknown	unknown	unknown	-	-	-	+	+	other	+	+	+	+	+	-	-	+	other	-	1																	second pil1 gene1 independent next to ssrS	no	no	no
32	SE	SE_unknown_unknown		pR-5	NZ_FNZW01000000	unknown	unknown	unknown	unknown	unknown	unknown	-	-	-	+	+	other	+	+	+	+	+	-	-	+	other	-	1																	second pil1 gene1 independent next to ssrS	no	no	no
38	SE	SE_unknown_unknown		Sb13	NZ_FOLK01000000	unknown	unknown	unknown	unknown	unknown	unknown	+	+	other	+	+	-	+	+	+	+	-	-	-	+	+	-	1																	second pil1 gene1 independent next to ssrS	no	no	no
41	SE	SE_unknown_unknown		SI	NZ_FOYC01000000	unknown	unknown	unknown	unknown	unknown	unknown	+	+	other	+	+	-	+	+	+	+	+	-	-	+	+	-	1																	second pil1 operon with cnaB type domain protein third pil1 gene1 independent next to ssrS	no	no	no
17	SGG	SGG_animal_feces	2	DSM16831	NZ_CP018822	animal	koala bear	feces	feces	Australia	unknown	-	+	truncated	+	+	+	+	+	+	+	-	+	+	+	+	-	1	+ (0); - (2); truncated (0); other (0)	+ (1); - (1); truncated (0); other (0)	+ (0); - (1); truncated (1); other (0)	+ (1); - (1); truncated (0); other (0)	+ (1); - (1); truncated (0); other (0)	+ (1); - (1); truncated (0); other (0)	+ (2); - (0); truncated (0); other (0)	+ (2); - (0); truncated (0); other (0)	+ (2); - (0); truncated (0); other (0)	+ (1); - (1); truncated (0); other (0)	+ (1); - (1); truncated (0); other (0)	+ (2); - (0); truncated (0); other (0)	+ (2); - (0); truncated (0); other (0)	+ (2); - (0); truncated (0); other (0)	+ (2); - (0); truncated (0); other (0)	+ (1); - (1); truncated (0); other (0)	pil1 sortase present but remaining locus is matching pil2 for gene2 and gene 3 is truncated	no	no	no
13	SGG	SGG_animal_feces		LMG17956	NZ_CCBC01000000	animal	cow calf	feces	feces	the Netherlands	unknown	-	-	-	-	-	-	+	+	+	-	+	+	+	+	+	+	1																	no	no	no	no
55	SGG	SGG_animal_other	2	DD02	NZ_KQ968744-NZ_KQ968938	animal	primate	other	nasopharynx oral cavity	Madagascar	unknown	+	+	other	+	+	other	+	+	+	-	-	other	+	+	+	-	1	+ (2); - (0); truncated (0); other (0)	+ (2); - (0); truncated (0); other (0)	+ (0); - (0); truncated (0); other (2)	+ (1); - (0); truncated (1); other (0)	+ (2); - (0); truncated (0); other (0)	+ (0); - (0); truncated (1); other (1)	+ (2); - (0); truncated (0); other (0)	+ (2); - (0); truncated (0); other (0)	+ (2); - (0); truncated (0); other (0)	+ (0); - (2); truncated (0); other (0)	+ (0); - (2); truncated (0); other (0)	+ (0); - (0); truncated (0); other (2)	+ (2); - (0); truncated (0); other (0)	+ (2); - (0); truncated (0); other (0)	+ (1); - (1); truncated (0); other (0)	+ (0); - (2); truncated (0); other (0)	no	no	no	no
57	SGG	SGG_animal_other		DD03	NZ_KQ970569-NZ_KQ970758	animal	primate	other	nasopharynx oral cavity	Madagascar	unknown	+	+	other	truncated	+	truncated	+	+	+	-	-	other	+	+	-	-	1																	no	no	no	no
39	SGG	SGG_animal_rumen	6	ATCC700065	NZ_FOLZ01000000	animal	goat	rumen	rumen	Australia	unknown	+	+	other	+	+	+	+	+	+	+	-	-	+	+	+	+	1	+ (3); - (3); truncated (0); other (0)	+ (6); - (0); truncated (0); other (0)	+ (0); - (0); truncated (0); other (6)	+ (2); - (4); truncated (0); other (0)	+ (5); - (1); truncated (0); other (0)	+ (2); - (4); truncated (0); other (0)	+ (4); - (2); truncated (0); other (0)	+ (4); - (2); truncated (0); other (0)	+ (4); - (2); truncated (0); other (0)	+ (6); - (0); truncated (0); other (0)	+ (3); - (3); truncated (0); other (0)	+ (4); - (2); truncated (0); other (0)	+ (2); - (4); truncated (0); other (0)	+ (6); - (0); truncated (0); other (0)	+ (6); - (0); truncated (0); other (0)	+ (6); - (0); truncated (0); other (0)	no	no	no	no
43	SGG	SGG_animal_rumen		LMG 15572	NZ_FPBN01000000	animal	goat	rumen	rumen	Australia	unknown	+	+	other	+	+	+	+	+	+	+	-	-	+	+	+	+	1																	no	no	no	no
29	SGG	SGG_animal_rumen		VTM1R27	NZ_FNUH01000000	animal	moose	rumen	rumen	unknown	unknown	-	+	other	-	+	-	+	+	+	+	+	+	-	+	+	+	1																	pil1 and pil2 similar. Sortase pil1, gene2 pil2, gene 3 hypo RS07270-RS07280	pil1 and pil2 similar. Sortase pil1, gene2 pil2, gene 3 hypo RS07270-RS07280	no	no
33	SGG	SGG_animal_rumen		VTM1R29	NZ_FOBM01000000	animal	moose	rumen	rumen	unknown	unknown	-	+	other	-	+	-	+	+	+	+	+	+	-	+	+	+	1																	pil1 and pil2 similar. Sortase pil1, gene2 pil2, gene 3 hypo RS06825-RS06835	pil1 and pil2 similar. Sortase pil1, gene2 pil2, gene 3 hypo RS06825-RS06835	no	no
37	SGG	SGG_animal_rumen		VTM2R47	NZ_FOGM01000000	animal	moose	rumen	rumen	unknown	unknown	-	+	other	-	+	-	-	-	-	+	-	+	-	+	+	+	1																	pil1 and pil2 similar. Sortase pil1, gene2 pil2, gene 3 hypo RS10585-RS10595	pil1 and pil2 similar. Sortase pil1, gene2 pil2, gene 3 hypo RS10585-RS10595	no	no
21	SGG	SGG_animal_rumen		VTM3R42	NZ_FNFJ01000000	animal	moose	rumen	rumen	unknown	unknown	+	+	other	-	-	-	-	-	-	+	+	+	-	+	+	+	1																	no	no	no	no
3	SGG	SGG_human_blood	6	ATCC BAA-2069	NC_015215+NC_015219	human	human	blood	blood	Germany	unknown	+	+	+	+	+	+	+	+	+	+	+	+	+	+	+	+	1	+ (6); - (0); truncated (0); other (0)	+ (6); - (0); truncated (0); other (0)	+ (6); - (0); truncated (0); other (0)	+ (6); - (0); truncated (0); other (0)	+ (6); - (0); truncated (0); other (0)	+ (6); - (0); truncated (0); other (0)	+ (6); - (0); truncated (0); other (0)	+ (6); - (0); truncated (0); other (0)	+ (6); - (0); truncated (0); other (0)	+ (6); - (0); truncated (0); other (0)	+ (6); - (0); truncated (0); other (0)	+ (6); - (0); truncated (0); other (0)	+ (6); - (0); truncated (0); other (0)	+ (6); - (0); truncated (0); other (0)	+ (6); - (0); truncated (0); other (0)	+ (4); - (2); truncated (0); other (0)	no	no	no	no
7	SGG	SGG_human_blood		ATCC43143	NC_017576	human	human	blood	blood	Belgium	unknown	+	+	+	+	+	+	+	+	+	+	+	+	+	+	+	+	1																	no	no	no	no
52	SGG	SGG_human_blood		NTS 31106099	NZ_JYKU01000000	human	human	blood	infective endocarditis and colorectal cancer	France	unknown	+	+	+	+	+	+	+	+	+	+	+	+	+	+	+	-	1																	no	no	no	no
60	SGG	SGG_human_blood		NTS 31307655	NZ_LXFC01000000	human	human	blood	blood infective endocarditis	France	unknown	+	+	+	+	+	+	+	+	+	+	+	+	+	+	+	+	1																	no	no	no	no
46	SGG	SGG_human_blood		TX20005	NZ_GL397173-8	human	human	blood	heart	USA	unknown	+	+	+	+	+	+	+	+	+	+	+	+	+	+	+	-	1																	no	pil2 RS07735-RS07750 extended by a fourth gene. Maybe third gene split or repetition but size of pil2 original seems ok alredy	no	no
2	SGG	SGG_human_blood		UCN34	NC_013798	human	human	blood	blood	France	unknown	+	+	+	+	+	+	+	+	+	+	+	+	+	+	+	+	1																	no	no	no	no
16	SGG	SGG_human_feces	2	icddrb-nrc-s1	NZ_CP013688	human	human	feces	feces	Bangladesh	unknown	-	-	-	-	-	-	+	+	+	-	-	-	-	+	+	-	1	+ (0); - (2); truncated (0); other (0)	+ (0); - (2); truncated (0); other (0)	+ (0); - (2); truncated (0); other (0)	+ (0); - (2); truncated (0); other (0)	+ (0); - (2); truncated (0); other (0)	+ (0); - (2); truncated (0); other (0)	+ (1); - (1); truncated (0); other (0)	+ (1); - (1); truncated (0); other (0)	+ (1); - (1); truncated (0); other (0)	+ (0); - (2); truncated (0); other (0)	+ (0); - (2); truncated (0); other (0)	+ (0); - (2); truncated (0); other (0)	+ (0); - (2); truncated (0); other (0)	+ (2); - (0); truncated (0); other (0)	+ (2); - (0); truncated (0); other (0)	+ (0); - (2); truncated (0); other (0)	no	no	no	no
58	SGG	SGG_human_feces		icddrb-nrc-s3	NZ_LPVQ01000000	human	human	feces	feces	Bangladesh	unknown	-	-	-	-	-	-	-	-	-	-	-	-	-	+	+	-	1																	no	no	no	no
53	SGM	SGM_food_food	2	33MO	NZ_KL537416-NZ_KL537489	food	cheese	food	cheese	Italy	unknown	-	-	-	-	-	-	-	-	-	-	-	-	-	+	other	-	1	+ (0); - (2); truncated (0); other (0)	+ (0); - (2); truncated (0); other (0)	+ (0); - (2); truncated (0); other (0)	+ (0); - (2); truncated (0); other (0)	+ (0); - (2); truncated (0); other (0)	+ (0); - (2); truncated (0); other (0)	+ (1); - (1); truncated (0); other (0)	+ (1); - (1); truncated (0); other (0)	+ (1); - (1); truncated (0); other (0)	+ (0); - (2); truncated (0); other (0)	+ (0); - (2); truncated (0); other (0)	+ (0); - (2); truncated (0); other (0)	+ (0); - (2); truncated (0); other (0)	+ (2); - (0); truncated (0); other (0)	+ (1); - (0); truncated (0); other (1)	+ (0); - (2); truncated (0); other (0)	no	no	no	no
5	SGM	SGM_food_food		ACA-DC 198	NC_016749-NC_016750	food	cheese	food	cheese	Greece	unknown	-	-	-	-	-	-	+	+	+	-	-	-	-	+	+	-	1																	no	no	no	no
4	SGP	SGP_human_blood	1	ATCC 43144	NC_015600	human	human	blood	blood	Belgium	unknown	-	-	-	-	-	-	+	+	+	-	-	+	-	+	+	-	1	+ (0); - (1); truncated (0); other (0)	+ (0); - (1); truncated (0); other (0)	+ (0); - (1); truncated (0); other (0)	+ (0); - (1); truncated (0); other (0)	+ (0); - (1); truncated (0); other (0)	+ (0); - (1); truncated (0); other (0)	+ (1); - (0); truncated (0); other (0)	+ (1); - (0); truncated (0); other (0)	+ (1); - (0); truncated (0); other (0)	+ (0); - (1); truncated (0); other (0)	+ (0); - (1); truncated (0); other (0)	+ (1); - (0); truncated (0); other (0)	+ (0); - (1); truncated (0); other (0)	+ (1); - (0); truncated (0); other (0)	+ (1); - (0); truncated (0); other (0)	+ (0); - (1); truncated (0); other (0)	no	no	no	no
51	SGP	SGP_unknown_unknown	3	651-SPAS	NZ_JUYN00000000	unknown	unknown	unknown	unknown	unknown	unknown	-	-	-	-	-	-	-	-	-	-	-	-	-	-	-	-	1	+ (0); - (3); truncated (0); other (0)	+ (0); - (3); truncated (0); other (0)	+ (0); - (3); truncated (0); other (0)	+ (0); - (3); truncated (0); other (0)	+ (0); - (3); truncated (0); other (0)	+ (0); - (3); truncated (0); other (0)	+ (0); - (3); truncated (0); other (0)	+ (0); - (3); truncated (0); other (0)	+ (0); - (3); truncated (0); other (0)	+ (0); - (3); truncated (0); other (0)	+ (0); - (3); truncated (0); other (0)	+ (0); - (3); truncated (0); other (0)	+ (0); - (3); truncated (0); other (0)	+ (1); - (2); truncated (0); other (0)	+ (1); - (2); truncated (0); other (0)	+ (0); - (3); truncated (0); other (0)	no	no	no	no
54	SGP	SGP_unknown_unknown		GED7275A	NZ_KQ961413-NZ_KQ961488	unknown	unknown	unknown	unknown	unknown	unknown	-	-	-	-	-	-	-	-	-	-	-	-	-	+	+	-	1																	no	no	no	no
14	SGP	SGP_unknown_unknown		hc-2909-2	NZ_CDEY00000000	unknown	unknown	unknown	unknown	unknown	unknown	-	-	-	-	-	-	-	-	-	-	-	-	-	-	-	-	1																	no	no	no	no
6	SII	SII_food_food	1	CJ18	NC_016826+NC_016837	food	camel milk	food	fermented camel milk	Kenya	2008	-	+	-	-	-	-	+	+	+	+	-	-	-	+	other	-	1	+ (0); - (1); truncated (0); other (0)	+ (1); - (0); truncated (0); other (0)	+ (0); - (1); truncated (0); other (0)	+ (0); - (1); truncated (0); other (0)	+ (0); - (1); truncated (0); other (0)	+ (0); - (1); truncated (0); other (0)	+ (1); - (0); truncated (0); other (0)	+ (1); - (0); truncated (0); other (0)	+ (1); - (0); truncated (0); other (0)	+ (1); - (0); truncated (0); other (0)	+ (0); - (1); truncated (0); other (0)	+ (0); - (1); truncated (0); other (0)	+ (0); - (1); truncated (0); other (0)	+ (1); - (0); truncated (0); other (0)	+ (0); - (0); truncated (0); other (1)	+ (0); - (1); truncated (0); other (0)	no	no	no	no
18	SII	SII_human_feces	2	ATCC BAA-102	NZ_DS572674-NZ_DS572694	human	human	feces	feces	UK	unknown	-	+	-	-	-	-	+	+	+	+	-	-	-	+	+	-	1	+ (0); - (2); truncated (0); other (0)	+ (1); - (1); truncated (0); other (0)	+ (0); - (2); truncated (0); other (0)	+ (0); - (2); truncated (0); other (0)	+ (0); - (2); truncated (0); other (0)	+ (0); - (2); truncated (0); other (0)	+ (1); - (1); truncated (0); other (0)	+ (1); - (1); truncated (0); other (0)	+ (1); - (1); truncated (0); other (0)	+ (1); - (1); truncated (0); other (0)	+ (0); - (2); truncated (0); other (0)	+ (0); - (2); truncated (0); other (0)	+ (0); - (2); truncated (0); other (0)	+ (1); - (1); truncated (0); other (0)	+ (1); - (1); truncated (0); other (0)	+ (0); - (2); truncated (0); other (0)	no	no	no	no
15	SII	SII_human_feces		ICDDRB-NRC-S5	NZ_CP013589	human	human	feces	feces	Bangladesh	unknown	-	-	-	-	-	-	-	-	-	-	-	-	-	-	-	-	1																	no	no	no	no
56	SL	SL_animal_other	1	DD06	NZ_KQ969241-NZ_KQ969281	animal	lemur catta	other	nose	Germany	unknown	-	-	-	-	-	-	-	-	-	-	-	+	-	+	+	-	1	+ (0); - (1); truncated (0); other (0)	+ (0); - (1); truncated (0); other (0)	+ (0); - (1); truncated (0); other (0)	+ (0); - (1); truncated (0); other (0)	+ (0); - (1); truncated (0); other (0)	+ (0); - (1); truncated (0); other (0)	+ (0); - (1); truncated (0); other (0)	+ (0); - (1); truncated (0); other (0)	+ (0); - (1); truncated (0); other (0)	+ (0); - (1); truncated (0); other (0)	+ (0); - (1); truncated (0); other (0)	+ (1); - (0); truncated (0); other (0)	+ (0); - (1); truncated (0); other (0)	+ (1); - (0); truncated (0); other (0)	+ (1); - (0); truncated (0); other (0)	+ (0); - (1); truncated (0); other (0)	no	no	no	no
8	SL	SL_human_feces	1	033	NC_021900	human	human	feces	feces	China	unknown	-	-	-	-	-	-	-	-	-	-	-	-	-	+	other	-	1	+ (0); - (1); truncated (0); other (0)	+ (0); - (1); truncated (0); other (0)	+ (0); - (1); truncated (0); other (0)	+ (0); - (1); truncated (0); other (0)	+ (0); - (1); truncated (0); other (0)	+ (0); - (1); truncated (0); other (0)	+ (0); - (1); truncated (0); other (0)	+ (0); - (1); truncated (0); other (0)	+ (0); - (1); truncated (0); other (0)	+ (0); - (1); truncated (0); other (0)	+ (0); - (1); truncated (0); other (0)	+ (0); - (1); truncated (0); other (0)	+ (0); - (1); truncated (0); other (0)	+ (1); - (0); truncated (0); other (0)	+ (0); - (0); truncated (0); other (1)	+ (0); - (1); truncated (0); other (0)	no	no	no	no
	Locus Tag			UCN34								GALLO_2177	GALLO_2178	GALLO_2179	GALLO_1568	GALLO_1569	GALLO_1570	GALLO_2038	GALLO_2039	GALLO_2040	GALLO_0748	GALLO_0112	GALLO_2032	GALLO_0577	GALLO_0636	GALLO_1368	GALLO_1675		GALLO_2177	GALLO_2178	GALLO_2179	GALLO_1568	GALLO_1569	GALLO_1570	GALLO_2038	GALLO_2039	GALLO_2040	GALLO_0748	GALLO_0112	GALLO_2032	GALLO_0577	GALLO_0636	GALLO_1368	GALLO_1675
	REFERENCE protein sequence size (AA)			UCN34								275	480	658	275	505	641	312	478	1664	1573	1301	775	750	91	992	759		275	480	658	275	505	641	312	478	1664	1573	1301	775	750	91	992	759
	Min. AA sequence match for «+»											200	400	600	200	400	600	200	400	1000	1000	1000	500	500	50	500	500		200	400	600	200	400	600	200	400	1000	1000	1000	500	500	50	500	500
	Identity threshold (%)											50	50	50	50	50	50	50	50	50	50	50	50	50	50	50	50		50	50	50	50	50	50	50	50	50	50	50	50	50	50	50	50
										full match +	count total
										SE	31	16	16	0	24	24	0	27	26	27	22	21	3	1	27	7	2			27
										SGG	18	11	15	6	10	14	9	15	15	15	13	10	12	12	18	17	11			15
										SGM	2	0	0	0	0	0	0	1	1	1	0	0	0	0	2	1	0			1
										SGP	4	0	0	0	0	0	0	1	1	1	0	0	1	0	2	2	0			1
										SII	3	0	2	0	0	0	0	2	2	2	2	0	0	0	2	1	0			2
										SL	2	0	0	0	0	0	0	0	0	0	0	0	1	0	2	1	0			0
										other	count
										SE	31	0	0	14	0	0	9	0	0	0	0	0	0	0	0	18	0			0
										SGG	18	0	0	8	0	0	1	0	0	0	0	0	2	0	0	0	0			0
										SGM	2	0	0	0	0	0	0	0	0	0	0	0	0	0	0	1	0			0
										SGP	4	0	0	0	0	0	0	0	0	0	0	0	0	0	0	0	0			0
										SII	3	0	0	0	0	0	0	0	0	0	0	0	0	0	0	1	0			0
										SL	2	0	0	0	0	0	0	0	0	0	0	0	0	0	0	1	0			0
